# Supplementary material for: Effects of Pioglitazone on Nonalcoholic Fatty Liver Disease in the Absence of Constitutive Androstane Receptor Expression
Source: Hindawi journal article supplement (doi:10.1155/2018/9568269), 2018-09-27

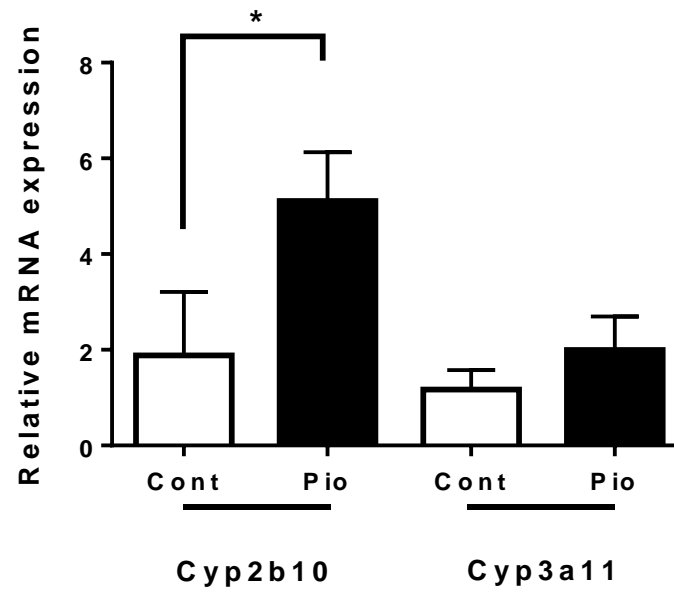

Supplementary Figure 2

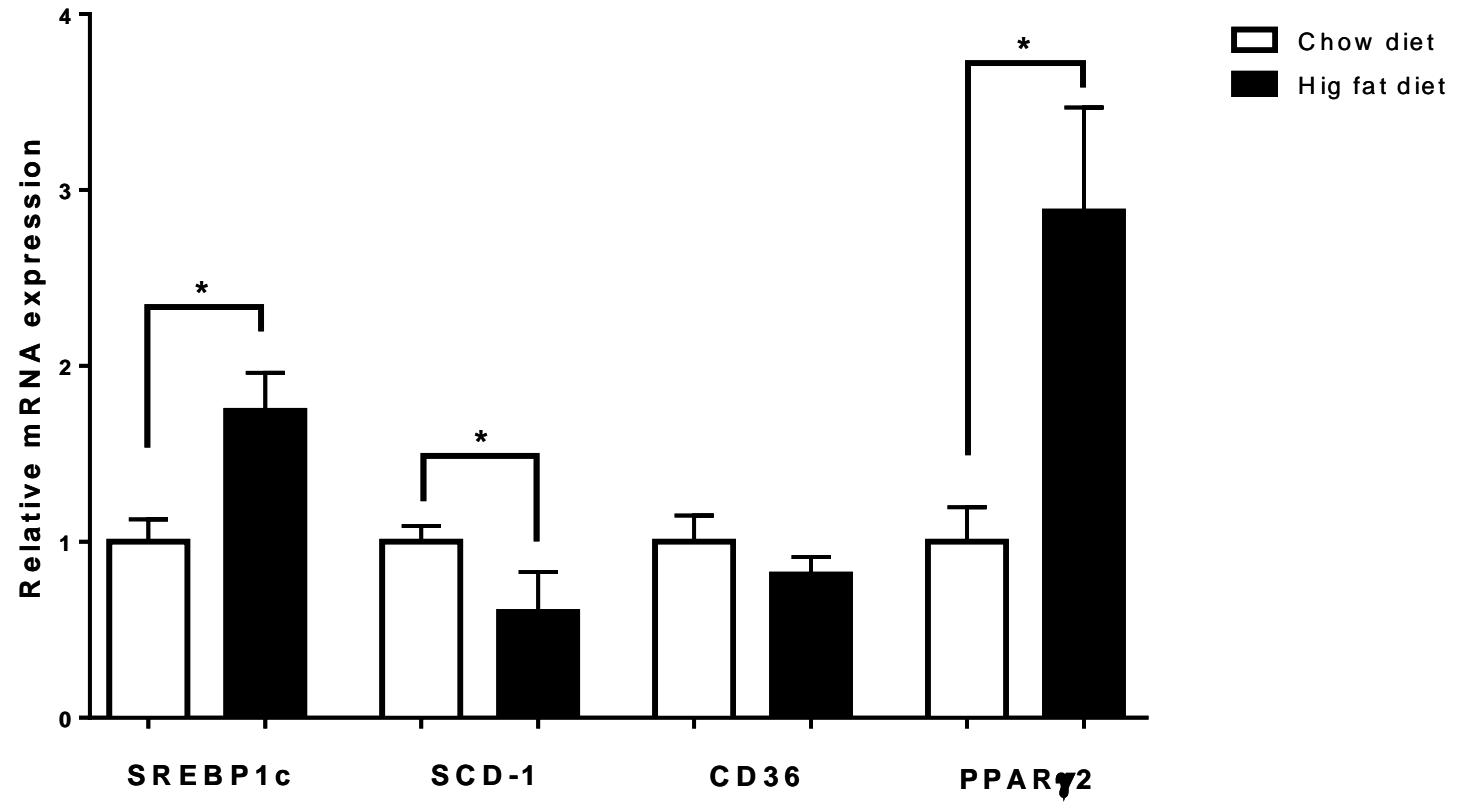

Supplementary Figure 3

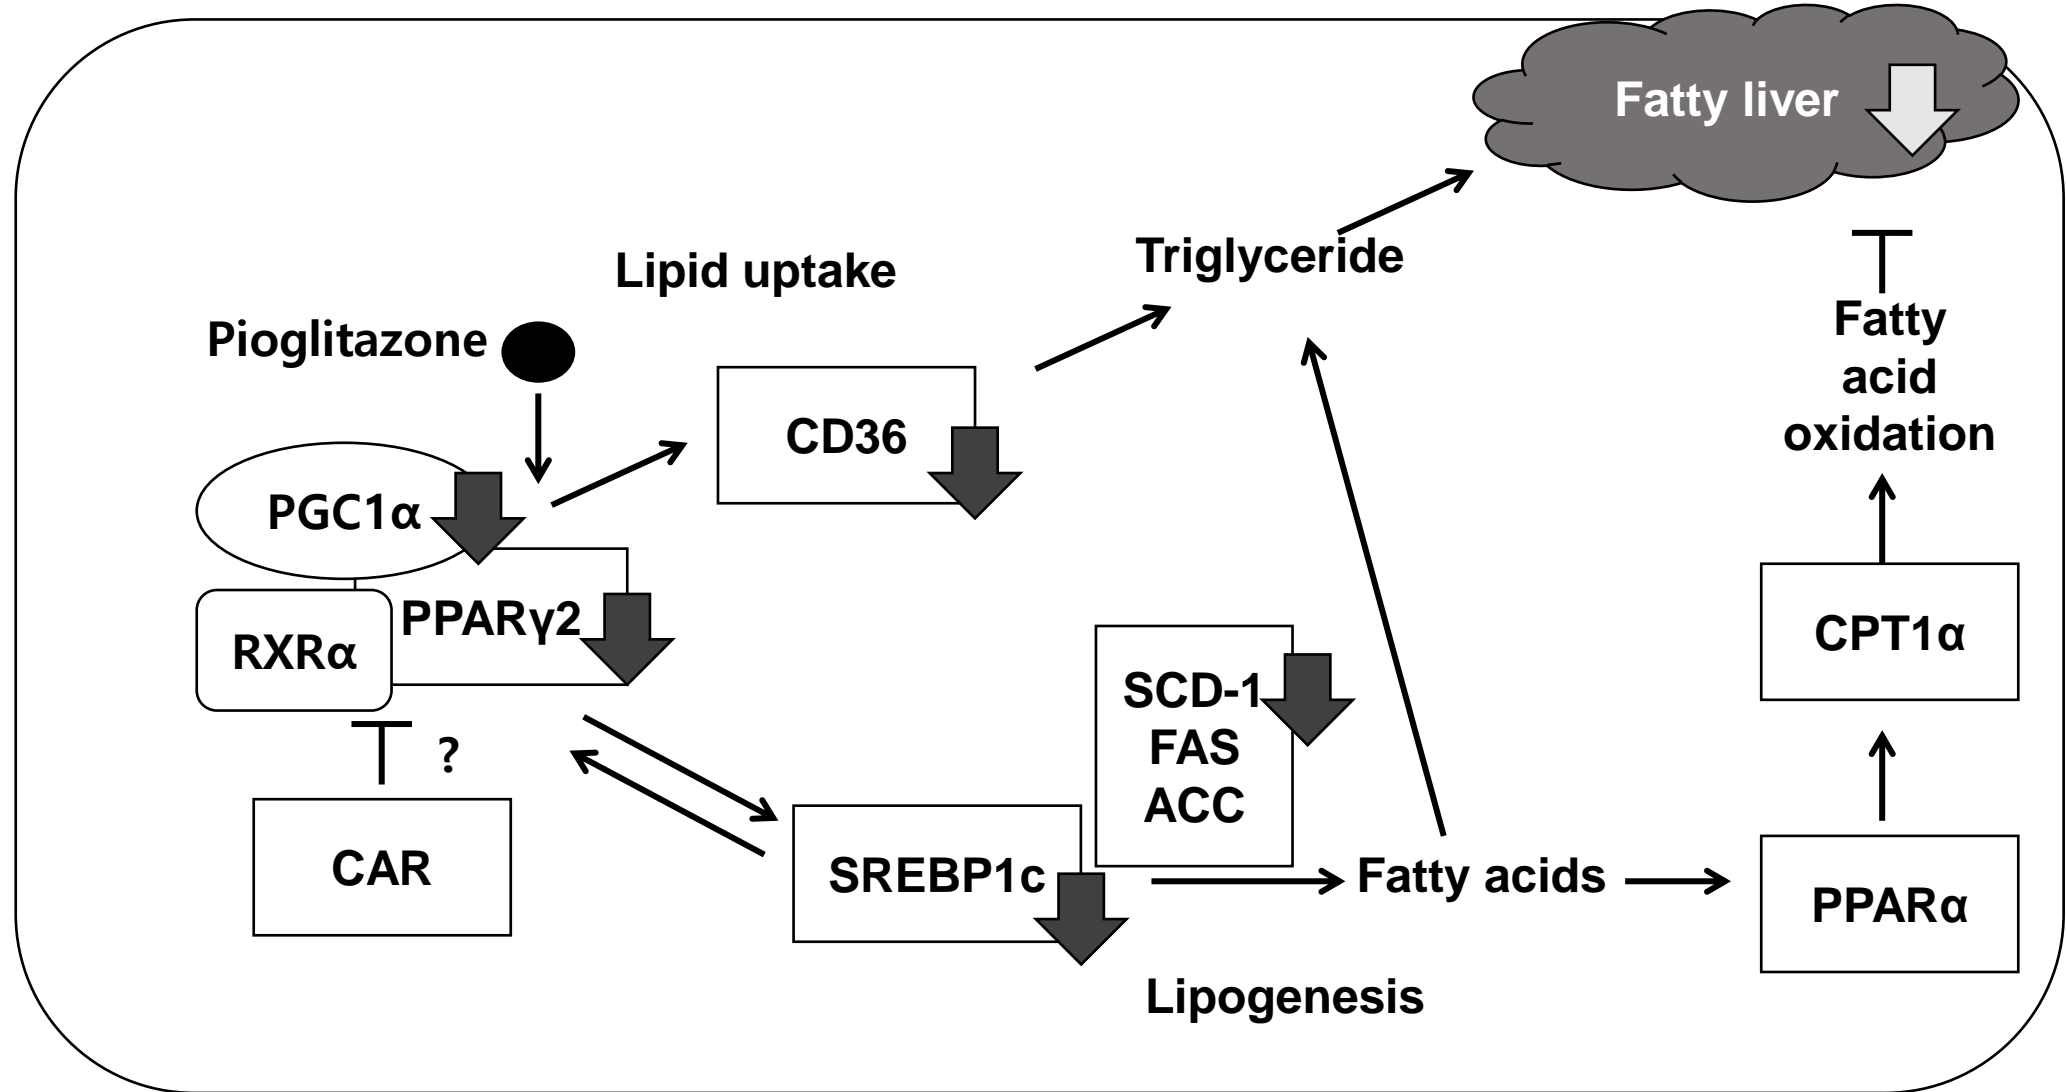

Supplement: f1 [file 9568269.f1.pdf]
